# Supplementary material
Source: PubMed Central journal article supplement (PMC7035927)

# Supplemental fig. 1

Measured changes in rectal temperature, heart rate and respiratory rate of three cows after intramammary infusion of *M. bovis* during the 14-day study period (Day 0 = day of infusion)

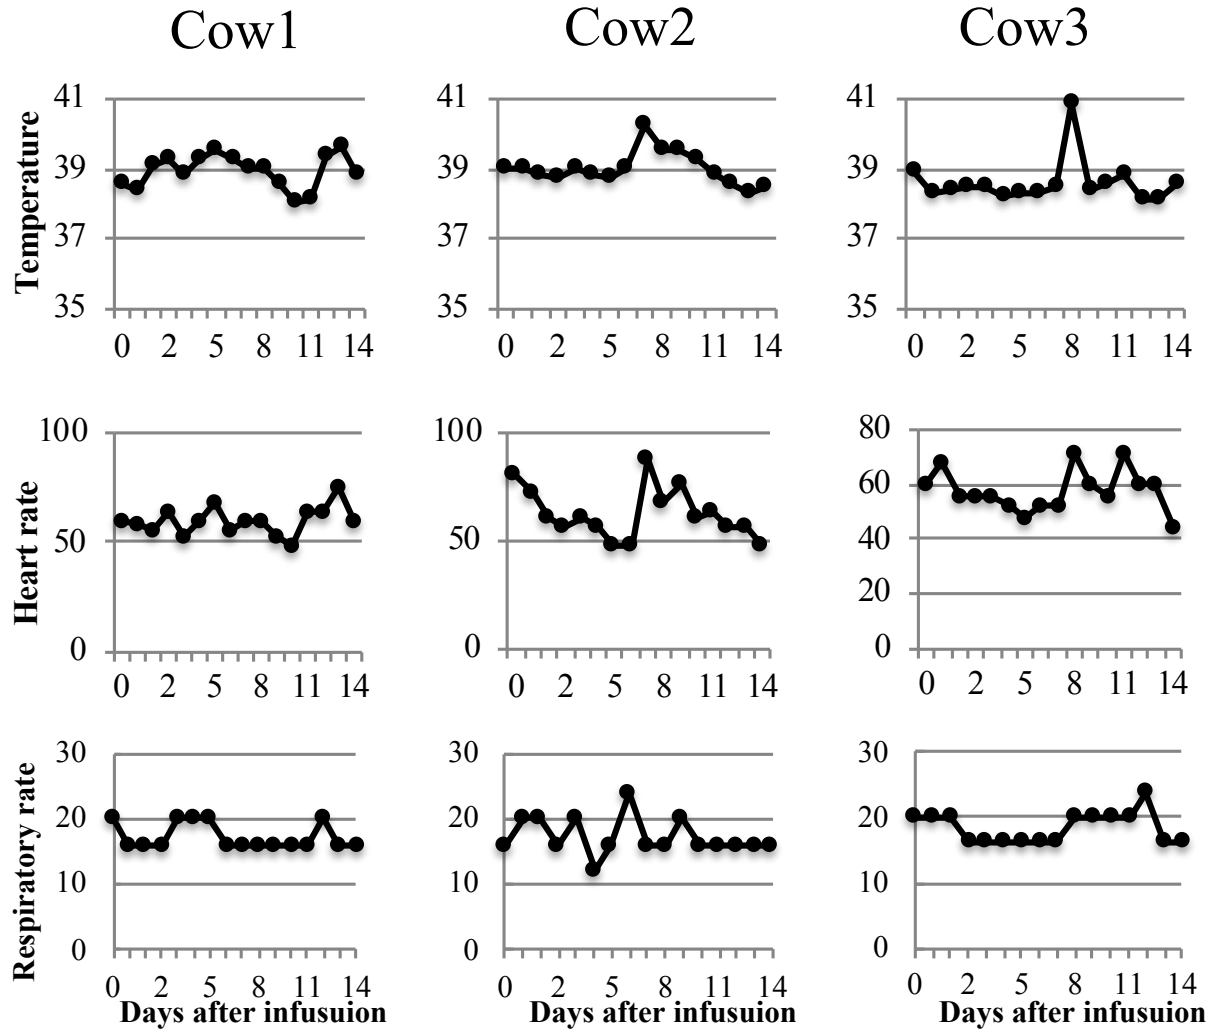

Supplement: zii999093009s1.pdf [file zii999093009s1.pdf]
