# Supplementary material
Source: PubMed Central journal article supplement (PMC7035927)
Supplement: zii999093009s2.pdf [file zii999093009s2.pdf]

# Supplemental table 1

## Difference expression genes of blood MNCs in intramammary infusion of *M. bovis* at D7.

| Ensembl Transcript ID | Gene Symbol         | Description                                                                                                  | log(FC)  |
|-----------------------|---------------------|--------------------------------------------------------------------------------------------------------------|----------|
| ENSBTAT00000006432    | TGM3                | transglutaminase 3                                                                                           | 2.96215  |
| ENSBTAT00000037991    | IFT27               | intraflagellar transport 27                                                                                  | -2.1218  |
| ENSBTAT00000015339    | GDA                 | guanine deaminase                                                                                            | -2.04713 |
| ENSBTAT00000008157    | IFT27               | intraflagellar transport 27                                                                                  | -1.88162 |
| ENSBTAT00000011924    | MMP19               | matrix metalloproteinase 19                                                                                  | -1.62223 |
| ENSBTAT00000021759    | VNN2                | vanin 2                                                                                                      | -1.58925 |
| ENSBTAT000000117935   | CYP27A1             | cytochrome P450, family 27, subfamily A, polypeptide 1                                                       | -1.57239 |
| ENSBTAT00000043778    | CTNND1              | catenin (cadherin-associated protein), delta 1                                                               | -1.54126 |
| ENSBTAT00000036255    | ZNF618              | zinc finger protein 618                                                                                      | -1.49977 |
| ENSBTAT00000027862    | SIRPB1              | signal-regulatory protein beta 1                                                                             | -1.47762 |
| ENSBTAT00000063284    | CFD                 | complement factor D (adipsin)                                                                                | -1.45001 |
| ENSBTAT00000008933    | EHD4                | EH-domain containing 4                                                                                       | -1.44665 |
| ENSBTAT00000009971    | KIAA1598            | KIAA1598 ortholog                                                                                            | -1.44087 |
| ENSBTAT00000001412    | PILRA               | paired immunoglobulin-like type 2 receptor alpha                                                             | -1.40061 |
| ENSBTAT00000024068    | LYPD3               | LY6/PLAUR domain containing 3                                                                                | -1.39777 |
| ENSBTAT00000012815    | FGL2                | fibrinogen-like 2                                                                                            | -1.39103 |
| ENSBTAT00000019526    | ADAMTS2             | ADAM metalloproteinase with thrombospondin type 1 motif, 2                                                   | -1.3762  |
| ENSBTAT00000020104    | USHBP1              | Usher syndrome 1C binding protein 1                                                                          | -1.36989 |
| ENSBTAT00000026323    | PRKCDBP             | protein kinase C, delta binding protein                                                                      | -1.36905 |
| ENSBTAT00000015898    | BATF3               | basic leucine zipper transcription factor, ATF-like 3                                                        | -1.36115 |
| ENSBTAT00000013165    | IGSF8               | immunoglobulin superfamily, member 8                                                                         | -1.35422 |
| ENSBTAT00000065290    | VSTM1               | V-set and transmembrane domain containing 1                                                                  | -1.34393 |
| ENSBTAT00000066000    | FCN1                | ficolin (collagen/fibrinogen domain containing) 1                                                            | -1.34049 |
| ENSBTAT00000014308    | CMBL                | carboxymethylenebutenolidase homolog (Pseudomonas)                                                           | -1.34012 |
| ENSBTAT00000011785    | RAP1GAP             | RAP1 GTPase activating protein                                                                               | -1.33949 |
| ENSBTAT00000002383    | SNX10               | sorting nexin 10                                                                                             | -1.32922 |
| ENSBTAT00000025261    | KCNT1               | potassium channel, subfamily T, member 1                                                                     | -1.30885 |
| ENSBTAT00000002385    | SLC2A6              | solute carrier family 2 (facilitated glucose transporter), member 6                                          | -1.29401 |
| ENSBTAT00000000950    | NDRG1               | N-myc downstream regulated 1                                                                                 | -1.25956 |
| ENSBTAT00000048850    | SPSB2               | splA/ryanodine receptor domain and SOCS box containing 2                                                     | -1.24715 |
| ENSBTAT00000019496    | NAPRT               | nicotinate phosphoribosyltransferase                                                                         | -1.23282 |
| ENSBTAT00000044038    | PPARG               | peroxisome proliferator-activated receptor gamma                                                             | -1.20929 |
| ENSBTAT00000065623    | FCN1                | ficolin (collagen/fibrinogen domain containing) 1                                                            | -1.18554 |
| ENSBTAT00000011388    | SULT1A1             | sulfotransferase family, cytosolic, 1A, phenol-preferring, member 1                                          | -1.15616 |
| ENSBTAT00000006742    | SLC31A2             | solute carrier family 31 (copper transporter), member 2                                                      | -1.14466 |
| ENSBTAT00000000231    | LOC781146           | lysozyme                                                                                                     | -1.14342 |
| ENSBTAT00000007041    | DES                 | desmin                                                                                                       | -1.13228 |
| ENSBTAT00000026052    | TBC1D2              | TBC1 domain family, member 2                                                                                 | -1.11302 |
| ENSBTAT00000021077    | FLTP                | cilia and flagella associated protein 126                                                                    | -1.10914 |
| ENSBTAT00000016300    | AKR7A3;<br>AKR7A2   | aldo-keto reductase family 7, member A3 (aflatoxin aldehyde reductase)                                       | -1.09308 |
| ENSBTAT00000020664    | DLC1                | DLC1 Rho GTPase activating protein                                                                           | -1.07505 |
| ENSBTAT00000001463    | ANXA4               | annexin A4                                                                                                   | -1.03832 |
| ENSBTAT00000033792    | FAM63A              | amily with sequence similarity 63, member A                                                                  | -1.03101 |
| ENSBTAT00000020985    | EFNB1               | ephrin-B1                                                                                                    | -1.03058 |
| ENSBTAT00000028416    | SCAMP5              | secretory carrier membrane protein 5                                                                         | -1.02145 |
| ENSBTAT00000000141    | TNFSF13;<br>TNFSF12 | tumor necrosis factor (ligand) superfamily, member 13, tumor necrosis factor (ligand) superfamily, member 12 | -1.01578 |
| ENSBTAT00000017923    | MARVELD1            | MARVEL domain containing 1                                                                                   | -1.00297 |
