# Supplementary material
Source: PubMed Central journal article supplement (PMC7035927)
Supplement: zii999093009s3.pdf [file zii999093009s3.pdf]

## Supplemental table 2

GO term enrichment of blood MNCs in intramammary infusion of *M. bovis* at D7.

| Description                                                              | P-Value    | Corrected P-Value |
|--------------------------------------------------------------------------|------------|-------------------|
| cell morphogenesis                                                       | 0.00237093 | 0.336672          |
| immune system process                                                    | 0.0106972  | 1                 |
| cell differentiation                                                     | 0.0114526  | 1                 |
| lipid binding                                                            | 0.013824   | 1                 |
| cytoplasmic membrane-bounded vesicle                                     | 0.0141485  | 1                 |
| hydrolase activity, acting on carbon-nitrogen<br>(but not peptide) bonds | 0.0160528  | 1                 |
| catabolic process                                                        | 0.0172952  | 1                 |
| anatomical structure development                                         | 0.0226945  | 1                 |
| extracellular matrix organization                                        | 0.0261284  | 1                 |
| endosome                                                                 | 0.0295421  | 1                 |
| cell wall organization or biogenesis                                     | 0.0389424  | 1                 |
