# Supplementary material
Source: PubMed Central journal article supplement (PMC7035927)
Supplement: zii999093009s4.pdf [file zii999093009s4.pdf]

## Supplemental table 3

Collected blood for hematological examination (a), biochemical examination (b) and peripheral blood white blood cells counts (c). Data are means  $\pm$  SEM for result from three cows.

(a)

|                   | D0                | D1                | D3                 | D7               | D14                |
|-------------------|-------------------|-------------------|--------------------|------------------|--------------------|
| WBC ( $10^2$ /UL) | 66.33 $\pm$ 3.53  | 65.33 $\pm$ 6.39  | 75.67 $\pm$ 0.33   | 65 $\pm$ 18.56   | 101.67 $\pm$ 11.33 |
| RBC ( $10^4$ /UL) | 671.67 $\pm$ 6.69 | 671.33 $\pm$ 7.54 | 655.33 $\pm$ 11.26 | 712 $\pm$ 39.8   | 654.67 $\pm$ 20.28 |
| HGB (g/dl)        | 10.33 $\pm$ 0.5   | 10.47 $\pm$ 0.58  | 10.47 $\pm$ 0.57   | 10.9 $\pm$ 0.64  | 9.9 $\pm$ 0.31     |
| HCT (%)           | 31.87 $\pm$ 0.69  | 31.6 $\pm$ 0.87   | 30.83 $\pm$ 0.99   | 33.8 $\pm$ 1.31  | 31.3 $\pm$ 0.35    |
| MCV (fL)          | 47.43 $\pm$ 0.88  | 47.07 $\pm$ 0.99  | 47.03 $\pm$ 0.99   | 47.57 $\pm$ 0.81 | 47.87 $\pm$ 0.95   |
| MCH (pg)          | 15.37 $\pm$ 0.75  | 15.57 $\pm$ 0.71  | 15.97 $\pm$ 0.62   | 15.37 $\pm$ 0.93 | 15.13 $\pm$ 0.64   |
| MCHC (g/dl)       | 32.4 $\pm$ 1.02   | 33.07 $\pm$ 0.97  | 33.93 $\pm$ 0.81   | 32.27 $\pm$ 1.78 | 31.63 $\pm$ 1.14   |
| PLT ( $10^4$ /UL) | 36.52 $\pm$ 2.48  | 46.47 $\pm$ 6.83  | 43.9 $\pm$ 10.25   | 65.6 $\pm$ 16.3  | 48.67 $\pm$ 9.38   |

(b)

|                  | D0               | D1                 | D3                 | D7                 | D14                |
|------------------|------------------|--------------------|--------------------|--------------------|--------------------|
| TP (g/dl)        | 7.43 $\pm$ 0.2   | 7.4 $\pm$ 0.3      | 7.5 $\pm$ 0.25     | 7.4 $\pm$ 0.35     | 7.97 $\pm$ 0.12    |
| ALB (g/dl)       | 3.83 $\pm$ 0.12  | 3.77 $\pm$ 0.19    | 3.83 $\pm$ 0.17    | 2.5 $\pm$ 1.21     | 3.73 $\pm$ 0.03    |
| A/G ratio        | 1.08 $\pm$ 0.11  | 1.05 $\pm$ 0.09    | 1.05 $\pm$ 0.08    | 0.67 $\pm$ 0.29    | 0.88 $\pm$ 0.04    |
| AST (IU/l)       | 133 $\pm$ 38.04  | 130.33 $\pm$ 41.28 | 113 $\pm$ 27.18    | 101.67 $\pm$ 16.46 | 97 $\pm$ 4.51      |
| GGT (IU/l)       | 40.67 $\pm$ 5.67 | 40.33 $\pm$ 5.84   | 40.67 $\pm$ 6.17   | 41.67 $\pm$ 9.17   | 40.67 $\pm$ 6.69   |
| Fe ( $\mu$ g/dl) | 113 $\pm$ 15.59  | 122 $\pm$ 29.87    | 136.67 $\pm$ 38.11 | 98 $\pm$ 54.01     | 181.67 $\pm$ 32.92 |

(c)

|                    | D0               | D1                | D3               | D7                | D14              |
|--------------------|------------------|-------------------|------------------|-------------------|------------------|
| Stab cell (%)      | 0 $\pm$ 0        | 0 $\pm$ 0         | 0 $\pm$ 0        | 0 $\pm$ 0         | 0 $\pm$ 0        |
| Segmented cell (%) | 51.67 $\pm$ 1.45 | 45.67 $\pm$ 9.4   | 31.33 $\pm$ 8.88 | 36 $\pm$ 10.69    | 55.67 $\pm$ 6.77 |
| Lymphocyte (%)     | 37.33 $\pm$ 4.26 | 43.67 $\pm$ 10.14 | 50.33 $\pm$ 9.68 | 52.67 $\pm$ 12.25 | 38 $\pm$ 4.93    |
| Monocyte (%)       | 7 $\pm$ 1.53     | 6.67 $\pm$ 2.96   | 9.33 $\pm$ 2.73  | 4.33 $\pm$ 2.85   | 3.33 $\pm$ 3.33  |
| Eosinophil (%)     | 3.67 $\pm$ 1.2   | 4 $\pm$ 2.65      | 8.67 $\pm$ 1.45  | 7 $\pm$ 2.08      | 3 $\pm$ 0.58     |
| Basophil (%)       | 0 $\pm$ 0        | 0 $\pm$ 0         | 0.33 $\pm$ 0.33  | 0 $\pm$ 0         | 0 $\pm$ 0        |
