# Supplementary material
Source: PubMed Central journal article supplement (PMC7035927)
Supplement: zii999093009s5.pdf [file zii999093009s5.pdf]

Table S4

Sequences of oligonucleotide primers.

| Gene name      | Primer sequence (5'-3')                                           | Accession number | Reference |
|----------------|-------------------------------------------------------------------|------------------|-----------|
| $\beta$ -actin | F: AGC AAG CAG GAG TAC GAT GAG<br>R: ATC CAA CCG ACT GCT GTC A    | NM_173979        | [1]       |
| YWHAZ          | F: GCA TCC CAC AGA CTA TTT CC<br>R: GCA AAG ACA ATG ACA GAC CA    | GU817014         | [2]       |
| GAPDH          | F: GGC GTG AAC CAC GAG AAG TAT AA<br>R: CCC TCC ACG ATG CCA AAG T | NM_001034034     | [1]       |
| CFD            | F : CAC TGA GCG AAT GAT GTG CG<br>R: TAC CGG GCT TCT TGT GGT TG   | NM_001034255     |           |
| FCN1           | F: TGG AGA GAA AGG AGA GTC GGG<br>R: GGA AAA CGG TCC ACC CCC      | NM_001010996     |           |
| TNFSF13        | F: ATC TAG CGG CGG TTT GAG AC<br>R: TGA GGA TGG GGC TTC TTG TG    | NM_001034647     |           |
| PD-1           | F: AAT GAC AGC GGC GTC TAC TT<br>R: GAT GAC CAG GCT CTG CAT CT    | AB510901         | [3]       |
| LAG-3          | F: CTG TTC AGG AGT CCC CAC AT<br>R: GAC AAG ACT GGA TCC CCA CA    | AB608099         | [4]       |
| Tim-3          | F: GGA TCC AAT TCC CCA CA<br>R: AGG GTC TTC AGT GTC CGT GT        | AB689695         | [5]       |
| CTLA-4         | F: CCA GAG TCA TGG GAC TTG GT<br>R: TCA CAT GAG AAG CTG GCA AC    | AB910937         | [6]       |
| PD-L1          | F: GGG GGT TTA CTG TTG CTT GA<br>R: GCC ACT CAG TTG GTG AT        | NM_001163412.1   | [7]       |

F, forward; R, reverse; bps, base pairs

## References

1. Robinson TL, Sutherland IA, Sutherland J. 2007. Validation of candidate bovine reference genes for use with real-time PCR. *Vet Immunol Immunopathol* 115:160–5.
2. Spalenza V, Girolami F, Bevilacqua C, Riondato F, Rasero R, Nebbia C, Sacchi P, Martin P. 2011. Identification of internal control genes for quantitative expression analysis by real-time PCR in bovine peripheral lymphocytes. *Vet J* 189:278–83.
3. Ikebuchi R, Konnai S, Sunden Y, Onuma M, Ohashi K. 2010. Molecular cloning and expression analysis of bovine programmed death-1. *Microbiol Immunol* 54:291-8.
4. Shirai T, Konnai S, Ikebuchi R, Okagawa T, Suzuki S, Sunden Y, Onuma M, Murata S, Ohashi K. 2011. Molecular cloning of bovine lymphocyte activation gene-3 and its expression characteristics in bovine leukemia virus-infected cattle. *Vet Immunol Immunopathol* 144:462-7.
5. Okagawa T, Konnai S, Ikebuchi R, Suzuki S, Shirai T, Sunden Y, Onuma M, Murata S, Ohashi K. 2012. Increased bovine Tim-3 and its ligand expressions during bovine leukemia virus infection. *Vet Res* 43:45.
6. Suzuki S, Konnai S, Okagawa T, Ikebuchi R, Nishimori A, Kohara J, Mingala CN, Murata S, Ohashi K. 2015. Increased expression of the regulatory T cell-associated marker CTLA-4 in bovine leukemia virus infection. *Vet Immunol Immunopathol* 163:115-24.
7. Ikebuchi R, Konnai S, Shirai T, Sunden Y, Murata S, Onuma M, Ohashi K. 2011. Increase of cells expressing PD-L1 in bovine leukemia virus infection and enhancement of anti-viral immune responses in vitro via PD-L1 blockade. *Vet Res* 42:103.
